# Supplementary material for: Persistent inhibition of pore-based cell migration by sub-toxic doses of miuraenamide, an actin filament stabilizer
Source: PubMed Central journal article supplement (PMC5703899; doi:10.1038/s41598-017-16759-7), 2017-11-27

# **Persistent inhibition of pore-based cell migration by sub-toxic doses of miuraenamamide, an actin filament stabilizer**

Christina Moser<sup>1</sup>, Daniel Rüdiger<sup>1</sup>, Florian Förster<sup>1</sup>, Julia von Blume<sup>2</sup>, Peng Yu<sup>3</sup>, Bernhard Küster<sup>3</sup>, Uli Kazmaier<sup>4</sup>, Angelika M. Vollmar<sup>1</sup> and Stefan Zahler<sup>1</sup>

<sup>1</sup> Department of Pharmacy, Ludwig-Maximilians-Universität, Munich, Germany

<sup>2</sup> Max Planck Institute of Biochemistry, Martinsried, Germany

<sup>3</sup> Chair of Proteomics and Bioanalytics, Technical University of Munich, Munich, Germany

<sup>4</sup> Chair of Organic Chemistry, Saarland University, Saarbrücken, Germany

**Supplement Table 1: Red cluster of proteome analysis (downregulated at 56 h, log2 scale).**

|                    |             |            | <b>Gene symbol</b>             | <b>Ctrl</b> | <b>56h</b> |
|--------------------|-------------|------------|--------------------------------|-------------|------------|
|                    |             |            | ATP1A1                         | 0,414       | -0,244     |
|                    |             |            | ATP2C1                         | -0,200      | -2,498     |
| <b>Gene symbol</b> | <b>Ctrl</b> | <b>56h</b> | ATP5I                          | 0,147       | -2,707     |
| AAMDC              | -0,193      | -2,333     | ATP6V1B2                       | 0,391       | -1,910     |
| ABCC1              | 1,086       | -1,780     | ATP6V1G1                       | -0,175      | -2,365     |
| BHD10              | 0,986       | -0,932     | ATXN2                          | 0,991       | -1,356     |
| ABHD5              | 1,362       | -1,824     | B3GAT1                         | 0,581       | -2,459     |
| ABLIM1             | -0,570      | -1,542     | BAX                            | 0,874       | -2,472     |
| ABT1               | 0,569       | -1,713     | BBS2                           | 0,340       | -1,495     |
| ABTB1              | -0,807      | -1,652     | BCAS2                          | 0,732       | -2,550     |
| ACP6               | 0,347       | -2,505     | BIN3                           | 0,519       | -2,203     |
| ADD2               | 0,626       | -2,356     | BLMH                           | 0,850       | -2,248     |
| ADHFE1             | 1,332       | -1,549     | BMP2K                          | 0,165       | -1,443     |
| AGO3               | 0,168       | -2,320     | BMS1                           | 1,518       | -1,379     |
| AIDA               | 0,922       | -0,862     | BOD1L1                         | -0,014      | -0,799     |
| AIM1               | 0,353       | -1,290     | BOLA3                          | 1,007       | -2,021     |
| AKAP10             | 0,248       | -2,165     | BRCC3                          | 0,473       | -1,891     |
| AKR7A2             | 0,956       | -1,231     | BUD13                          | 0,877       | -2,566     |
| ALDH2              | -0,092      | -0,352     | C14orf2;MP68                   | 0,830       | -1,952     |
| ALG1               | 0,388       | -1,339     | C17orf49;BAP18;RNASEK-C17orf49 | 0,383       | -0,878     |
| AMBRA1             | 1,643       | -0,982     | C2orf49                        | 0,950       | -1,333     |
| ANAPC2             | 1,149       | -2,066     | C6orf106                       | -0,711      | -0,877     |
| ANAPC7             | 1,364       | -2,336     | C9orf41                        | 1,075       | -2,068     |
| ANKS1A             | 1,399       | -0,645     | CABLES1                        | 0,477       | -2,432     |
| ANKS3              | 0,736       | -2,426     | CAMK1                          | 0,460       | -1,887     |
| AOC1               | 0,958       | -2,085     | CASP10                         | 0,805       | -1,676     |
| AP3M2              | 1,241       | -1,988     | CCDC138                        | 1,957       | -1,080     |
| AP3S1              | 1,301       | -1,912     | CCDC18                         | 2,239       | -1,285     |
| AP4B1              | 0,704       | -1,396     | CCDC53                         | 0,602       | -2,713     |
| APIP               | 0,809       | -1,576     | CCNDBP1                        | 0,336       | -2,220     |
| APOA1BP            | -0,432      | -1,541     | CDIPT                          | 0,482       | -1,023     |
| APP                | 0,251       | -1,553     | CDK11A                         | -0,148      | -1,463     |
| ARF5               | 0,858       | -1,476     | CDYL                           | 1,578       | -1,923     |
| ARHGAP23           | 0,615       | -1,712     | CENPT                          | 1,744       | -1,360     |
| ARHGEF7            | 0,471       | -2,350     | CEP162                         | -0,437      | -1,395     |
| ARIH2              | 0,461       | -2,099     | CES1                           | -0,228      | -1,572     |
| ARL14EP            | 1,121       | -1,852     | CFLAR                          | -0,471      | -1,617     |
| ARL6IP5            | 1,142       | -2,394     | CHD6                           | 0,664       | -2,318     |
| ASMTL              | -0,253      | -1,692     | CHD8                           | 0,549       | -2,500     |
| ATE1               | 0,110       | -2,319     | CHMP5                          | 0,075       | -2,266     |
| ATG10              | 0,877       | -1,445     | CIR1                           | 0,974       | -2,223     |
| ATG101             | 1,774       | -2,012     | CLK2                           | -1,377      | -1,817     |
| ATG12              | 0,415       | -2,428     | CMC1                           | 0,738       | -2,445     |
| ATG16L1            | 0,361       | -1,480     | CMPK1                          | -0,029      | -2,412     |

| Gene symbol   | Ctrl   | 56h    | Gene symbol       | Ctrl   | 56h    |
|---------------|--------|--------|-------------------|--------|--------|
| CMTR2         | 1,755  | -1,596 | EPB41L1           | -1,002 | -0,683 |
| CNN3          | 0,785  | -1,600 | EPG5              | 0,067  | -1,429 |
| COA6          | -1,263 | -1,727 | EPN1              | 0,374  | -1,474 |
| COMMD6        | 0,087  | -2,588 | EPN2              | 0,736  | -0,897 |
| COPS3         | 1,863  | -1,770 | ERCC4             | 1,310  | -1,747 |
| CPEB2         | -0,289 | -2,399 | EVL               | 0,347  | -1,883 |
| CPSF6         | 1,551  | -1,569 | EXOC8             | 1,848  | -1,848 |
| CRELD2        | 0,560  | -1,957 | FAHD2A;FAHD2B     | 1,116  | -0,817 |
| CREM          | 0,495  | -2,144 | FAM109A           | 2,574  | -1,171 |
| CRKL          | 1,017  | -2,462 | FAM111A           | 1,860  | -2,017 |
| CROT          | 0,504  | -2,205 | FAM114A1          | -0,217 | -1,996 |
| CSNK1A1       | 1,030  | -2,068 | FAM168B           | 0,673  | -2,337 |
| CSNK1D        | 1,141  | -1,936 | FAM174B           | 0,585  | -1,697 |
| CSNK1E        | -1,380 | -0,968 | FAM193A           | 0,472  | -2,188 |
| CSNK2A2       | 1,081  | -1,736 | FAM20B            | 0,300  | -1,896 |
| CSRP2         | 1,363  | -1,909 | FAM219A           | 1,162  | -2,320 |
| CTNNBIP1      | 0,344  | -2,751 | FAM96B            | 1,294  | -2,439 |
| CTSH          | -0,086 | -2,422 | FANCM             | -0,571 | -1,703 |
| CUTC          | 0,537  | -2,427 | FBXL8             | -0,243 | -2,166 |
| CYB5R4        | 0,507  | -2,463 | FBXO42            | 0,924  | -1,230 |
| DCAF6         | 0,531  | -1,581 | FCHSD2            | 0,967  | -1,363 |
| DCTN4         | -0,129 | -1,121 | FKBP2             | -0,518 | -2,011 |
| DCUN1D5       | 1,061  | -2,448 | FLII              | 1,130  | 0,402  |
| DDAH1         | 1,175  | -1,448 | FLNC              | -0,881 | -1,821 |
| DDI2          | 1,421  | -2,028 | FOXE1             | 0,674  | -1,002 |
| DESI1         | 1,224  | -2,311 | FOXO6;FOXO4;FOXO1 | 0,569  | -2,433 |
| DHRS4;DHRS4L2 | 0,480  | -1,493 | GALNT7            | 0,659  | -2,595 |
| DHRS7B        | 0,746  | -1,865 | GAMT              | -0,660 | -1,857 |
| DNAJC8        | 1,480  | -1,129 | GCC2              | 0,537  | -2,080 |
| DNPEP         | 0,386  | -2,578 | GEMIN2            | 0,870  | -1,955 |
| DOCK11        | 0,263  | -2,345 | GIT1              | 1,806  | -0,713 |
| DPYD          | 0,189  | -2,403 | GLCC11            | -0,336 | -1,760 |
| DTX2          | 0,528  | -2,211 | GLG1              | 1,105  | -1,947 |
| DUSP12        | 1,316  | -1,989 | GLS               | 1,104  | 0,675  |
| DVL3          | 1,324  | -1,681 | GM2A              | 0,393  | -0,557 |
| E2F7          | 2,028  | -1,963 | GNB1L             | -0,762 | -1,806 |
| EAPP          | 0,967  | -2,338 | GNB5              | 0,929  | -2,596 |
| ECI2          | 0,942  | -0,600 | GOLGA1            | 1,913  | -1,460 |
| EED           | 1,606  | -1,826 | GORASP2           | 0,430  | -2,430 |
| EFHC1         | 0,749  | -1,840 | GOSR1             | 0,168  | -2,055 |
| EHD3          | 0,327  | -2,480 | GPCPD1            | 1,123  | -2,319 |
| EIF3I         | 1,250  | -1,716 | GPHN              | 0,357  | -1,906 |
| EIF4E2        | 0,668  | -2,519 | GPN3              | 0,034  | -2,249 |
| ELMO1         | 0,507  | -2,349 | GSN               | -1,456 | 0,107  |
| EP300         | 1,169  | -2,379 | GSTK1             | 0,282  | -1,427 |

| Gene symbol                 | Ctrl   | 56h    | Gene symbol      | Ctrl   | 56h    |
|-----------------------------|--------|--------|------------------|--------|--------|
| GSTZ1                       | 0,446  | -2,046 | MAP1LC3A         | 0,352  | -2,146 |
| GTDC1                       | 0,998  | -1,463 | MAP2K4           | 2,171  | -1,272 |
| HARS                        | -0,610 | -0,463 | MAPK11           | -0,057 | -2,468 |
| HCCS                        | 1,260  | -1,099 | MAPK14           | 1,009  | 0,497  |
| HDAC2                       | 0,960  | -1,726 | MAPK9            | 0,701  | -2,360 |
| HDHD1                       | 1,535  | -0,940 | MARCKSL1         | 0,896  | -1,341 |
| HIPK3                       | 1,186  | -1,894 | MARK2            | 0,860  | -1,417 |
| HLA-C;HLA-B                 | -0,621 | -0,714 | MATN3            | 0,831  | -1,202 |
| HLA-E                       | 1,268  | -2,038 | MCM8             | 1,583  | -1,176 |
| HMG20A                      | 0,907  | -2,484 | MED1             | 0,825  | -1,752 |
| HMOX2                       | 1,422  | -1,910 | MED17            | 0,755  | -1,391 |
| HNRNPUL2;HNRNPUL2-<br>BSCL2 | 1,136  | -1,796 | METTTL2B;METTL2A | 0,879  | -2,192 |
| HOMER1                      | 0,669  | -2,476 | METTTL5          | 1,213  | -2,059 |
| HOXB6                       | -0,371 | -2,262 | MINPP1           | 0,752  | -0,694 |
| HRSP12                      | 1,277  | -1,542 | MITD1            | 1,507  | -2,155 |
| HSPA4                       | 1,025  | -1,939 | MLEC             | 0,516  | 0,051  |
| HYI                         | 1,743  | -1,538 | MLLT6            | 0,421  | -2,408 |
| IFT22                       | 0,700  | -1,389 | MMS22L           | 1,631  | -1,463 |
| IFT57                       | 0,757  | -1,842 | MOB3A            | 0,715  | -1,474 |
| IKBKKG                      | -0,085 | -1,924 | MRPL33           | 0,236  | -1,356 |
| ILK                         | 0,187  | -2,227 | MSI2             | 0,319  | -1,831 |
| IMPA1                       | 0,691  | -1,555 | MTA2             | 1,706  | -1,319 |
| IMPAD1                      | 2,185  | -1,634 | MTERF3           | 1,288  | -1,765 |
| INPP4B                      | 1,355  | -2,209 | MTFR1L           | 0,708  | -2,552 |
| ISG20L2                     | 1,524  | -1,762 | MTHFR            | 0,043  | -1,439 |
| ISYNA1                      | -0,174 | -1,288 | MTM1             | 1,455  | -1,609 |
| IWS1                        | 0,376  | -2,738 | MTMR2            | 1,097  | -2,460 |
| JMY                         | -0,370 | -1,198 | MTPN             | 0,190  | -1,877 |
| KBTBD11                     | 0,199  | -1,692 | MVB12A           | 0,296  | -1,934 |
| KCT2                        | 0,795  | -1,392 | MYL1;MYL3        | 0,682  | -2,169 |
| KCTD1                       | 0,379  | -1,552 | NAB1             | 1,538  | -1,900 |
| KCTD14                      | 0,775  | -2,243 | NADSYN1          | 1,044  | -1,631 |
| KIAA0586                    | 0,355  | -1,788 | NAGA             | 0,967  | -1,867 |
| KIAA0930                    | 1,351  | -1,976 | NAPB             | 0,296  | -2,451 |
| KIF1B                       | 0,664  | 1,930  | NDUFB8           | 1,340  | -2,358 |
| KIF3A                       | 1,184  | -1,290 | NFAT5            | 0,064  | -0,931 |
| KLHL11                      | 0,290  | -1,751 | NFKB1            | 1,841  | -0,385 |
| LDB1                        | 1,228  | -2,439 | NFKBIE           | -0,238 | -2,176 |
| LEO1                        | 0,472  | -2,131 | NFYB             | 1,273  | -1,776 |
| LMAN2L                      | 0,887  | -1,575 | NFYC             | 0,978  | -2,048 |
| LPXN                        | 0,908  | -2,152 | NGEF             | 1,336  | -1,816 |
| LRRC14                      | -0,142 | -1,720 | NIPSNAP1         | 0,920  | -0,821 |
| LZTS3                       | -1,080 | -0,952 | NLRC5            | -0,089 | -2,501 |
| MAN2A1                      | 1,515  | -1,476 | NMD3             | 0,931  | -1,995 |
|                             |        |        | NME2             | 1,131  | -1,421 |

| Gene symbol | Ctrl   | 56h    | Gene symbol | Ctrl   | 56h    |
|-------------|--------|--------|-------------|--------|--------|
| NMI         | 0,432  | -1,094 | PMM1        | 0,465  | -1,732 |
| NMT1        | 0,620  | -2,125 | POGK        | -0,587 | -1,861 |
| NOP10       | 1,035  | -2,327 | POLG2       | -0,626 | -2,173 |
| NOV         | -0,070 | -1,423 | POLR3K      | 0,588  | -2,699 |
| NR2C2AP     | 0,990  | -1,684 | PPAT        | 0,291  | -0,983 |
| NSL1        | 0,282  | -1,692 | PPP1R12C    | -0,019 | -1,133 |
| NSMAF       | 1,101  | -2,230 | PPP1R3B     | 0,529  | -1,915 |
| NSUN2       | 1,742  | -1,666 | PPP2R1B     | 1,494  | -1,453 |
| NUDT14      | 0,454  | -2,330 | PPP2R5C     | 0,759  | -1,000 |
| NUDT5       | 1,233  | -1,997 | PPP3R1      | 0,614  | -1,877 |
| NXT1;NXT2   | 0,856  | -1,269 | PPP5C       | 1,036  | -1,847 |
| OARD1       | 1,675  | -2,133 | PRAME       | 0,890  | -1,388 |
| OCIAD1      | 1,462  | -1,468 | PRKCH;PRKCE | 1,035  | -1,948 |
| OGFR        | 1,479  | -1,200 | PRNP        | 0,778  | -2,597 |
| OIP5        | 1,101  | -2,362 | PRPF31      | 0,965  | -1,962 |
| OLA1        | 0,423  | -1,393 | PRPF38B     | 1,326  | -1,585 |
| OPA3        | 0,546  | -1,673 | PRPS1       | 1,847  | -1,651 |
| OPLAH       | -1,146 | -1,992 | PRPSAP2     | 0,305  | -2,154 |
| OSCP1       | 0,543  | -2,381 | PRR14       | 0,566  | -1,075 |
| PALM3       | 1,313  | -1,934 | PRR14L      | 1,218  | -1,998 |
| PAN2        | 0,115  | -1,902 | PRRC2B      | 0,102  | -2,002 |
| PARP2       | 0,907  | -1,866 | PSMA1       | 0,594  | -1,395 |
| PAXBP1      | 2,150  | -1,731 | PSMC4       | 0,372  | -1,438 |
| PCBD1       | 0,067  | -2,184 | PSME3       | 1,489  | -2,329 |
| PCBP2       | -0,754 | -1,851 | PTMA        | 0,171  | -2,268 |
| PCCA        | 1,247  | -1,705 | PTPN2       | 1,409  | -2,442 |
| PCDHGA4     | 0,340  | -1,634 | PTRH1       | 1,458  | -1,977 |
| PCTP        | 1,672  | -1,259 | PTRH2       | 0,217  | -1,803 |
| PDXP        | 1,330  | -2,040 | QDPR        | 0,734  | -2,356 |
| PFKL        | 0,685  | -1,822 | RAB43       | 0,829  | -1,427 |
| PGM2        | 0,667  | -2,320 | RABIF       | -0,322 | -1,588 |
| PHC3        | 0,591  | -2,223 | RAC2        | 0,897  | -1,895 |
| PHF20L1     | 0,702  | -1,597 | RAC3        | 0,792  | -1,863 |
| PHF3        | 1,523  | -1,778 | RASSF2      | 0,777  | -1,278 |
| PIP4K2A     | -0,008 | -2,577 | RBBP5       | 0,842  | -2,128 |
| PIP4K2C     | 0,537  | -1,998 | RBM27       | 1,246  | -2,105 |
| PIPSL       | 1,310  | -1,959 | RBMX2       | 0,986  | -1,590 |
| PIR         | 0,392  | -2,192 | RC3H1       | 0,040  | -0,475 |
| PITPNA      | 1,319  | -1,550 | RCOR3       | -0,284 | -2,423 |
| PLAUR       | 0,558  | -1,837 | REXO2       | 1,097  | -2,042 |
| PLCB3       | 1,805  | -1,512 | RFXANK      | 0,248  | -1,092 |
| PLEKHA3     | 1,154  | -1,662 | RHOA        | 0,926  | -1,682 |
| PLEKHB2     | 0,661  | -1,425 | RILPL2      | 0,930  | -2,243 |
| PLEKHF2     | 0,754  | -0,970 | RIPK1       | 1,067  | -2,118 |
| PLEKHG5     | 1,269  | -1,379 | RNF138      | 1,298  | -1,795 |

| Gene symbol  | Ctrl   | 56h    | Gene symbol      | Ctrl   | 56h    |
|--------------|--------|--------|------------------|--------|--------|
| RNF20        | 0,969  | -1,819 | SPTY2D1          | 1,141  | -2,286 |
| RNF7         | 0,165  | -2,600 | SQSTM1           | 0,288  | -1,725 |
| RNMT         | 0,789  | -2,455 | SRPX             | 1,840  | -0,997 |
| RNPS1        | 0,547  | -2,034 | SS18             | 1,122  | -2,039 |
| RPE          | -0,014 | -1,571 | SSH1             | 0,453  | -2,207 |
| RPRD1A       | -0,104 | -2,376 | STAU2            | 1,194  | -1,884 |
| RPS27L;RPS27 | 1,229  | -1,802 | STK3             | 1,757  | -1,779 |
| RPS29        | 0,444  | -2,671 | STK38L           | 0,219  | -2,464 |
| RSRC2        | 0,588  | -2,644 | STXBP1           | 1,307  | -2,124 |
| RUFY2        | 0,938  | -2,367 | STYX             | 1,115  | -1,670 |
| RUVBL1       | 1,190  | -1,343 | SULT1C2          | 0,905  | -2,216 |
| SAMD4A       | -0,052 | -0,749 | SURF4            | 1,153  | -2,451 |
| SAMD4B       | 1,150  | -2,361 | SUZ12            | 1,688  | -1,179 |
| SAP130       | 0,067  | -2,232 | SVIL             | 0,162  | -1,642 |
| SCFD1        | 0,830  | -1,969 | SYNE1            | 1,520  | -1,359 |
| SCRN2        | 0,939  | -1,174 | TADA1            | 0,214  | -1,899 |
| SDE2         | 0,143  | -2,096 | TAF9B            | 1,448  | -1,783 |
| SDF2         | 0,559  | -2,542 | TAGLN2           | 1,078  | -1,238 |
| SDSL         | 0,031  | -1,406 | TAOK1            | 1,171  | -1,660 |
| SEC61B       | 0,752  | -2,304 | TBC1D10B         | 1,443  | -1,144 |
| SECISBP2     | 0,329  | -1,595 | TBC1D25          | 1,076  | -1,808 |
| SECISBP2L    | 0,839  | -2,251 | TBC1D5           | 0,859  | -2,105 |
| SEH1L        | 1,247  | -2,066 | TBCEL            | 0,903  | -1,448 |
| SEPHS1       | -0,681 | -1,448 | TBX15            | 2,744  | -0,913 |
| SEPHS2       | 0,678  | -2,290 | TCEB1            | 0,990  | -1,815 |
| SEPN1        | 1,261  | -1,549 | TDP2             | 2,292  | -1,203 |
| SERPINB5     | 0,874  | -1,621 | TEN1             | 0,717  | -2,298 |
| SET          | 0,556  | -1,837 | TGFBRAP1         | -0,115 | -1,971 |
| SF1          | -0,131 | -0,288 | TH1L;NELFCD      | 0,897  | -1,752 |
| SFMBT1       | 1,222  | -2,058 | THAP11           | 1,046  | -1,954 |
| SH3KBP1      | 0,265  | -2,451 | THG1L            | 0,901  | -2,418 |
| SHB          | 1,112  | -1,490 | THOC5            | 0,815  | -1,148 |
| SIMC1        | 1,498  | -1,860 | THOC7            | 0,384  | -2,262 |
| SIPA1L1      | 0,789  | -2,112 | THUMPD2          | -0,044 | -1,121 |
| SIPA1L2      | 0,869  | -2,061 | TIMM10B          | 0,621  | -2,681 |
| SIX4         | 0,647  | -2,703 | TMED10           | 0,875  | -1,165 |
| SLC27A3      | 1,297  | -1,332 | TNIK             | 0,919  | -2,281 |
| SLC38A10     | 1,711  | -1,217 | TNK2             | 0,922  | -1,608 |
| SLC7A1       | 0,142  | -2,366 | TNRC6B           | 0,516  | -1,905 |
| SMARCA4      | 1,031  | -1,729 | TOM1L2           | 0,659  | -1,483 |
| SMYD3        | 1,342  | -1,481 | TOMM22           | 1,010  | -1,176 |
| SNRNP27      | 0,800  | -2,669 | TOR3A            | 0,780  | -1,431 |
| SON          | 1,202  | -2,455 | TPMT             | 1,175  | -1,994 |
| SOX13        | 0,721  | -2,711 | TRAPPC13         | 1,423  | -1,984 |
| SP140L       | 0,248  | -2,136 | TRAPPC2B;TRAPPC2 | 0,921  | -2,210 |

| Gene symbol | Ctrl   | 56h    | Gene symbol   | Ctrl  | 56h    |
|-------------|--------|--------|---------------|-------|--------|
| TRDMT1      | 1,776  | -1,472 | WASF2         | 0,442 | -1,719 |
| TRIP4       | -0,273 | -2,121 | WBSCR22       | 1,108 | -2,367 |
| TRMT11      | -0,019 | -2,506 | WDFY2         | 0,275 | -1,435 |
| TRMT44      | 1,046  | -1,888 | WDR37         | 0,465 | -2,114 |
| TSEN2       | 0,250  | -2,468 | WDR55         | 1,389 | -2,302 |
| TSTA3       | 0,535  | -1,318 | WDR77         | 0,385 | -0,952 |
| TTC26       | 1,890  | -1,402 | WEE1          | 1,397 | -1,269 |
| TTC27       | 1,583  | -1,383 | WHAMM         | 0,066 | -2,677 |
| TUBB8       | -0,309 | -1,869 | WHSC2;NELFA   | 0,752 | -1,296 |
| TUBG2;TUBG1 | 0,890  | -1,750 | WIZ           | 0,586 | -1,546 |
| TXNRD3      | 0,145  | -1,098 | WRN           | 1,186 | -2,378 |
| UBA5        | 0,527  | -2,719 | WTIP          | 0,713 | -2,026 |
| UBE2I       | 0,419  | -1,716 | YBX3          | 1,071 | -2,458 |
| UBE2Z       | 1,121  | -2,353 | YTHDC1        | 1,233 | -1,954 |
| UBP1        | 1,076  | -2,178 | ZC3H7B        | 0,990 | -1,996 |
| UBQLN1      | 0,707  | -1,820 | ZDHHC7        | 0,628 | -2,320 |
| UBQLN4      | 1,332  | -1,718 | ZFP36L2       | 0,916 | -1,428 |
| UBXN1       | 0,310  | -2,356 | ZFYVE19       | 0,150 | -1,772 |
| UCC1;EPDR1  | 0,154  | -1,108 | ZFYVE21       | 0,441 | -2,581 |
| UCKL1       | 0,472  | -1,804 | ZFYVE9        | 0,913 | -2,026 |
| UPF3A       | 1,064  | -2,400 | ZNF131        | 0,841 | -1,858 |
| UPRT        | 0,968  | -2,108 | ZNF274        | 1,223 | -1,700 |
| USB1        | 1,342  | -1,969 | ZNF408        | 1,291 | -2,015 |
| USP16       | 0,528  | -2,201 | ZNF616;ZNF480 | 2,312 | -0,891 |
| USP47       | 1,135  | -2,094 | ZNF618        | 0,272 | -2,139 |
| VPS36       | 1,437  | -2,158 | ZNF622        | 0,566 | -1,787 |
| VTA1        | 1,022  | -2,194 | ZNF696        | 1,265 | -1,449 |

**Supplement Table 2: Yellow cluster of proteome analysis (upregulated at 56 h, log<sub>2</sub> scale).**

| Gene symbol      | Ctrl   | 56h   |
|------------------|--------|-------|
| AARS             | 0,571  | 2,421 |
| AATF             | 1,056  | 2,026 |
| ABCC3            | 0,898  | 0,457 |
| ACBD6            | 0,320  | 1,859 |
| ACLY             | 0,306  | 2,349 |
| ACTG1;ACTB;ACTA1 | -1,773 | 1,490 |
| ACTL6A           | 1,022  | 1,895 |
| ACTR10           | -0,210 | 2,082 |
| ACTR3            | 0,393  | 1,996 |
| ADA              | -0,246 | 1,825 |
| ADAM10           | -0,070 | 1,720 |
| ADAT1            | 0,473  | 1,705 |
| ADAT3            | -0,118 | 1,044 |
| ADI1             | 0,625  | 1,106 |
| ADNP             | 0,772  | 2,037 |
| AES              | 0,191  | 0,389 |
| AFF1             | -0,726 | 2,486 |
| AGL              | -0,720 | 1,723 |
| AHCY             | 0,696  | 1,827 |
| AHCYL1           | -0,061 | 1,784 |
| AK2              | -0,289 | 1,311 |
| AKAP9            | 1,286  | 0,918 |
| AKR1B1           | 0,288  | 1,186 |
| ALDH1A2          | -0,689 | 1,215 |
| ALDH3A1          | -0,542 | 1,833 |
| ALPPL2;ALPP      | -0,129 | 0,416 |
| AMZ2             | 0,034  | 2,305 |
| ANKZF1           | -0,343 | 2,263 |
| ANXA1            | -0,625 | 1,625 |
| APLF             | -1,209 | 0,874 |
| APOC3            | -0,780 | 1,511 |
| ARFGAP2          | 1,459  | 0,992 |
| ARFGAP2          | 1,459  | 0,992 |
| ARHGAP31         | 1,221  | 1,410 |
| ARHGEF12         | 0,742  | 1,165 |
| ARHGEF26         | 1,069  | 1,841 |
| ARID4A           | -0,022 | 0,791 |
| ARL2             | -0,969 | 2,519 |
| ARL8A;ARL8B      | -0,385 | 2,558 |
| ARPC1B           | 0,757  | 0,706 |

| Gene symbol    | Ctrl   | 56h    |
|----------------|--------|--------|
| ASH2L          | 1,580  | 1,023  |
| ASPCR1         | 0,191  | 1,353  |
| ASS1           | -0,252 | 1,958  |
| ATAT1          | 0,137  | 1,141  |
| ATF2           | -1,198 | 2,062  |
| ATF7IP         | 0,867  | 0,514  |
| ATL2           | -0,628 | 2,188  |
| ATXN3          | 0,384  | 2,445  |
| AVL9           | 1,144  | 1,337  |
| BAG6           | 0,666  | 2,154  |
| BBS1           | -0,601 | 1,504  |
| BLOC1S3        | -0,733 | 2,254  |
| BLOC1S4        | -0,579 | 2,071  |
| BMP1           | -0,242 | -0,496 |
| BRAF           | 0,269  | 0,427  |
| BRD1           | 0,615  | -0,506 |
| BRD2           | 1,137  | 0,849  |
| BRE            | -0,082 | 1,974  |
| C10orf35       | 1,134  | 1,989  |
| C12orf43       | 1,122  | 1,447  |
| C15orf52       | 1,634  | 0,354  |
| C1orf122       | -0,088 | 1,946  |
| C5orf45        | 0,191  | 1,545  |
| C6orf203       | 0,202  | 1,405  |
| CAAP1          | 0,595  | 2,365  |
| CALB1          | -0,528 | 1,665  |
| CALD1          | -1,690 | 0,333  |
| CAPRIN1        | 0,576  | 2,048  |
| CAPRIN2        | -0,096 | 1,712  |
| CAPZA2         | -0,076 | 2,179  |
| CARKD;FLJ10769 | 0,783  | -0,121 |
| CARS           | -0,069 | 1,557  |
| CASK           | -0,666 | 1,623  |
| CASKIN1        | -1,135 | 1,285  |
| CASP2          | 0,130  | 2,339  |
| CASP6          | -0,548 | 2,652  |
| CBX1;CBX3      | -0,579 | 2,699  |
| CBX5           | -0,096 | 2,095  |
| CBX6           | -0,568 | 1,331  |
| CC2D1A         | -0,330 | 1,905  |
| CCAR2          | 0,927  | 2,063  |
| CCBL1          | 0,391  | 2,091  |
| CCDC47         | 0,169  | 2,303  |
| CCDC6          | -1,431 | 1,464  |



| Gene symbol            | Ctrl   | 56h    |
|------------------------|--------|--------|
| CCDC9                  | -0,474 | 2,595  |
| CCT2                   | 0,570  | 1,503  |
| CCT8                   | -0,037 | 1,923  |
| CD46                   | -0,032 | -0,076 |
| CD70                   | -0,592 | 0,582  |
| CDC37                  | -0,235 | 2,638  |
| CDH13                  | 0,763  | 1,387  |
| CDH6                   | -0,880 | 1,392  |
| CDK12                  | 0,012  | 2,130  |
| CDK13                  | 1,410  | 1,528  |
| CDK20                  | -0,409 | 1,788  |
| CEP104                 | 0,911  | 2,285  |
| CFDP1                  | -0,920 | 1,917  |
| CHAC2                  | 0,574  | 2,130  |
| CHCHD7                 | -1,217 | 1,031  |
| CHEK2                  | -0,021 | 2,635  |
| CHFR                   | 1,988  | 1,234  |
| CHM                    | 0,479  | 2,375  |
| CHMP2B                 | -1,496 | 1,424  |
| CHN1                   | -1,476 | 2,028  |
| CHRAC1                 | -0,041 | 1,120  |
| CHURC1-FNTB;FNTB       | -1,084 | 2,394  |
| CINP                   | 0,560  | 1,706  |
| CKB                    | -0,426 | 2,336  |
| CLEC16A                | -0,085 | 2,518  |
| CLIC4                  | -1,506 | 2,069  |
| CLK3                   | -0,486 | 1,687  |
| CLOCK                  | -0,742 | 1,563  |
| CMC4                   | -0,303 | 2,699  |
| CNIH4                  | 1,269  | 2,220  |
| CNOT11                 | 0,917  | 2,052  |
| CNOT2                  | 1,441  | 1,231  |
| CNRIP1                 | -1,042 | 2,530  |
| COL4A3BP               | 0,721  | 2,162  |
| COL5A2                 | -0,637 | 1,921  |
| COMMD1                 | -0,003 | 2,053  |
| COMMD3-BMI1;BMI1;PCGF2 | 0,658  | 2,237  |
| COQ7                   | 0,745  | 1,985  |
| CPOX                   | 0,638  | 1,287  |
| CPQ                    | -0,997 | 1,979  |
| CRTC1                  | -1,051 | 1,283  |
| CSF1                   | -1,352 | 0,976  |

| Gene symbol               | Ctrl   | 56h   |
|---------------------------|--------|-------|
| CTNBL1                    | 0,866  | 2,212 |
| CTSB                      | -1,124 | 2,130 |
| CTSL                      | 0,930  | 2,101 |
| CXCL8                     | -0,086 | 1,418 |
| CXXC5                     | -0,365 | 1,926 |
| DARS2                     | 0,911  | 1,720 |
| DAZAP1                    | -0,072 | 2,335 |
| DBNL                      | -0,975 | 2,342 |
| DCAF15                    | 0,670  | 2,523 |
| DCLK1                     | -0,038 | 1,556 |
| DCP2                      | 0,517  | 2,041 |
| DCTN6                     | -0,218 | 2,572 |
| DDX1                      | 0,613  | 2,087 |
| DDX39A                    | 0,335  | 2,379 |
| DDX39B;DDX39A;hCG_2005638 | -0,106 | 2,330 |
| DDX3X;DDX3Y               | 0,863  | 1,532 |
| DEK                       | 1,146  | 1,464 |
| DEPDC7                    | 1,286  | 0,633 |
| DES                       | -0,076 | 2,594 |
| DHX36                     | 0,654  | 1,867 |
| DLST                      | 1,152  | 1,538 |
| DMAP1                     | 1,139  | 2,245 |
| DNAJC11                   | 0,570  | 1,944 |
| DNAJC7                    | 0,936  | 1,786 |
| DNTTIP2                   | 0,871  | 1,486 |
| DPH5                      | -0,254 | 2,626 |
| DSC1                      | 0,820  | 1,862 |
| DSCC1                     | 1,034  | 2,210 |
| DSG1                      | 0,242  | 2,558 |
| DST                       | -0,566 | 2,047 |
| DTNB;DTNA                 | -0,198 | 0,780 |
| DYNC2LI1                  | -0,135 | 1,680 |
| E2F4                      | 0,829  | 2,071 |
| E2F8                      | 0,702  | 0,885 |
| ECHS1                     | 0,320  | 2,389 |
| EHBP1                     | -0,116 | 2,692 |
| EIF2A                     | -0,289 | 1,559 |
| EIF2S1                    | 0,668  | 2,430 |
| EIF3B                     | 0,672  | 2,189 |
| ELOF1                     | -0,391 | 2,185 |
| EMD                       | 0,760  | 1,643 |
| EML1                      | 0,447  | 0,627 |

| Gene symbol        | Ctrl   | 56h   |
|--------------------|--------|-------|
| EMSY;C11orf30      | 1,564  | 1,685 |
| ENAH               | -0,082 | 1,834 |
| ENO3               | -1,121 | 2,282 |
| EP400              | 0,473  | 1,830 |
| EPS15L1            | -0,124 | 1,251 |
| ERBB2              | 0,148  | 0,989 |
| ERCC6              | -1,057 | 1,191 |
| ERF                | 0,272  | 0,452 |
| EVI5L              | 0,465  | 0,461 |
| EXOC6              | 0,520  | 1,338 |
| FABP3              | 0,569  | 0,792 |
| FAM136A            | 0,195  | 2,337 |
| FAM168A            | 0,350  | 1,584 |
| FAM175B            | -0,213 | 2,538 |
| FAM188B            | -0,333 | 1,319 |
| FAM83G             | 1,329  | 2,005 |
| FAM96A             | -0,255 | 2,209 |
| FAM98B             | 0,149  | 1,861 |
| FBL                | 1,262  | 1,529 |
| FBRSL1             | -1,333 | 1,210 |
| FBXO3              | -0,344 | 2,347 |
| FH                 | 0,787  | 2,050 |
| FKBP11             | 1,410  | 1,188 |
| FKBP1A;FKBP12-Exp2 | -0,686 | 1,474 |
| FLOT2              | 0,738  | 1,448 |
| FOXK2              | 0,131  | 1,187 |
| FTO                | 0,422  | 2,391 |
| FUS                | -0,041 | 1,464 |
| FXR2               | 1,135  | 1,592 |
| FZD6               | -1,353 | 0,265 |
| GAB1               | -0,167 | 2,131 |
| GALNS              | 0,470  | 0,960 |
| GALNT1             | 0,218  | 1,004 |
| GAN                | -0,472 | 0,654 |
| GATSL3             | 0,463  | 0,497 |
| GBE1               | -0,347 | 1,134 |
| GCAT               | 0,734  | 2,076 |
| GCC1               | 1,683  | 1,587 |
| GCDH               | 0,276  | 2,495 |
| GDF15              | -0,788 | 1,404 |
| GDI1               | -0,180 | 1,841 |
| GFPT2              | 0,923  | 2,140 |
| GLB1               | -0,546 | 1,445 |

| Gene symbol                   | Ctrl   | 56h   |
|-------------------------------|--------|-------|
| GLDC                          | 0,231  | 1,591 |
| GLIPR2                        | 0,044  | 1,995 |
| GLRX                          | 0,588  | 0,836 |
| GNAI2;GNAT1;GNAI1;GNAT2;GNAT3 | -0,148 | 2,183 |
| GNG11;GNGT1;GNGT2             | 1,197  | 0,411 |
| GORAB                         | 0,455  | 1,835 |
| GPATCH1                       | 0,313  | 1,375 |
| GPI                           | 0,087  | 2,120 |
| GPN1                          | 0,253  | 2,067 |
| GPR108                        | -1,024 | 1,967 |
| GPS2                          | 0,070  | 2,673 |
| GPX1                          | -0,688 | 2,299 |
| GRN                           | -1,171 | 1,013 |
| GRSF1                         | 0,860  | 1,385 |
| GSE1                          | -0,424 | 1,766 |
| HAPLN3                        | -0,921 | 1,669 |
| HAUS7                         | 1,132  | 0,818 |
| HAX1                          | 0,368  | 1,240 |
| HBA1                          | 0,262  | 1,856 |
| HBA2                          | 0,028  | 1,933 |
| HBG2;HBG1                     | -1,741 | 1,073 |
| HBZ                           | -0,720 | 0,538 |
| HCLS1                         | -0,932 | 1,829 |
| HDDC2                         | -0,417 | 0,645 |
| HDDC3                         | -0,792 | 1,789 |
| HEBP1                         | -0,271 | 1,319 |
| HIBADH                        | 0,133  | 2,506 |
| HIP1                          | -0,079 | 2,425 |
| HIST1H1E;HIST1H1D             | 1,012  | 1,148 |
| HMGB2                         | -0,881 | 2,379 |
| HMG5                          | 0,343  | 0,201 |
| HMGXB3                        | -0,569 | 1,858 |
| HN1                           | -0,395 | 2,259 |
| HNF1A;HNF1B;HMBOX1            | 0,430  | 2,418 |
| HOXB4                         | -1,236 | 0,900 |
| HP1BP3                        | -0,383 | 2,298 |
| HPX                           | 0,000  | 1,475 |
| HR                            | 0,002  | 2,470 |
| HS1BP3                        | 0,472  | 1,255 |
| HSBP1                         | 1,106  | 1,700 |
| HSD17B8                       | -0,414 | 1,640 |

| Gene symbol | Ctrl   | 56h   |
|-------------|--------|-------|
| HSPA1A      | -0,839 | 2,078 |
| HSPA2       | -0,859 | 2,271 |
| HSPA4L      | 0,045  | 1,564 |
| HSPBAP1     | 0,798  | 0,994 |
| IAH1        | -0,439 | 2,622 |
| ICAM1       | -1,009 | 1,545 |
| IDH3A       | 0,790  | 1,901 |
| IDI1        | 1,880  | 0,905 |
| IFT52       | -0,074 | 2,035 |
| IL18        | 0,010  | 1,466 |
| INVS        | 0,725  | 1,730 |
| IQSEC2      | 0,013  | 2,069 |
| IRF5        | -0,170 | 1,609 |
| IRS1        | 0,155  | 2,021 |
| ITFG2       | 1,738  | 1,822 |
| ITFG3       | -0,490 | 1,191 |
| ITGB4       | 1,264  | 1,042 |
| ITGB8       | 0,500  | 1,028 |
| ITPKA       | -1,254 | 1,589 |
| ITPKB       | -0,268 | 1,554 |
| KANK1       | 0,690  | 1,814 |
| KCTD17      | -0,081 | 2,554 |
| KDM8        | -0,709 | 1,326 |
| KHNYN       | -0,228 | 1,808 |
| KIAA1161    | 0,100  | 1,905 |
| KIAA1522    | -0,753 | 1,771 |
| KIAA1598    | -1,031 | 1,516 |
| KIDINS220   | 0,057  | 0,869 |
| KIT         | -0,303 | 0,178 |
| KLC4        | -1,229 | 1,186 |
| L3HYPDH     | 0,079  | 1,676 |
| L3MBTL3     | 0,305  | 1,677 |
| LANCL2      | 0,135  | 2,325 |
| LASP1       | -0,798 | 1,628 |
| LCORL       | 0,252  | 2,300 |
| LCP1        | -1,329 | 0,651 |
| LDHB        | -0,056 | 1,792 |
| LDLR        | 0,420  | 0,565 |
| LENG1       | -0,290 | 2,388 |
| LMAN1       | -0,164 | 2,224 |
| LMNB2       | 0,313  | 1,852 |
| LPP         | -1,443 | 1,350 |
| LRRN1       | -1,232 | 0,516 |
| LSM12       | 1,603  | 1,157 |

| Gene symbol              | Ctrl   | 56h   |
|--------------------------|--------|-------|
| LSM2                     | -0,306 | 2,699 |
| MAK16                    | 0,833  | 1,398 |
| MAL2                     | 1,332  | 1,283 |
| MAN1A2                   | 0,588  | 1,656 |
| MAPRE1                   | 0,162  | 2,234 |
| MASP1                    | -0,293 | 2,096 |
| MCTS1                    | -0,056 | 2,463 |
| MED10                    | 0,132  | 1,610 |
| MED20                    | 0,460  | 2,519 |
| MED25                    | 0,371  | 1,777 |
| METRNL                   | 0,953  | 0,987 |
| MEX3D                    | -0,129 | 1,207 |
| MGMT                     | -0,099 | 1,338 |
| MIF4GD                   | -0,218 | 2,544 |
| MISP                     | 1,001  | 0,722 |
| MKNK1;DKFZ<br>p686E14208 | 0,359  | 1,554 |
| MMGT1                    | -0,489 | 1,667 |
| MMP21                    | -0,500 | 1,740 |
| MOB2                     | 0,604  | 1,808 |
| MPG                      | 0,749  | 0,803 |
| MPHOSPH8                 | -0,019 | 1,683 |
| MPRIP                    | 1,495  | 0,106 |
| MPST                     | 1,647  | 1,253 |
| MRE11A                   | 0,614  | 1,575 |
| MRPS25                   | 0,840  | 2,099 |
| MRTO4                    | 0,098  | 2,248 |
| MTAP                     | 1,402  | 1,074 |
| MTDH                     | 0,571  | 2,156 |
| MVD                      | -0,589 | 2,358 |
| MYDGF                    | -0,290 | 1,792 |
| MYH14                    | 0,480  | 1,700 |
| MYH9                     | -0,991 | 1,893 |
| MYL12A;MYL<br>12B        | -0,206 | 2,407 |
| MYO1D                    | 0,415  | 1,937 |
| NAA10;NAA1<br>1          | -0,152 | 2,451 |
| NACA                     | -0,923 | 0,879 |
| NAMPT                    | 1,384  | 1,662 |
| NAP1L4                   | -0,275 | 2,435 |
| NAPG                     | -0,287 | 2,631 |
| NCAPH                    | 1,483  | 1,291 |
| NCDN                     | 0,508  | 1,712 |
| NCK1                     | 0,374  | 2,031 |

| Gene symbol                            | Ctrl   | 56h    |
|----------------------------------------|--------|--------|
| NCKAP5L                                | -1,032 | 1,932  |
| NCOA1                                  | 0,307  | 2,477  |
| NDUFB3                                 | 1,070  | 0,595  |
| NEO1                                   | 0,491  | 1,259  |
| NFKB2                                  | 0,187  | 2,183  |
| NME1-<br>NME2;NME2;<br>NME1;NME2P<br>1 | -0,200 | 1,478  |
| NOL3                                   | 1,014  | 1,219  |
| NOVA1                                  | -1,066 | 1,741  |
| NPNT                                   | -0,327 | 1,302  |
| NRF1                                   | 0,534  | 2,021  |
| NUDT12                                 | 0,518  | 0,380  |
| NUDT18                                 | -0,468 | 1,462  |
| NUDT9                                  | -0,926 | 2,042  |
| NUMB                                   | 0,534  | 1,197  |
| NUMBL                                  | 0,430  | 1,956  |
| NUP43                                  | 0,013  | 2,447  |
| OGDH                                   | 0,685  | 1,952  |
| OGDHL                                  | 1,061  | 1,375  |
| P2RX4                                  | 0,727  | 2,191  |
| PANK3                                  | 0,674  | -0,240 |
| PAPOLA                                 | 0,661  | 1,288  |
| PARD6B                                 | -0,859 | 2,663  |
| PCDHGA10                               | -0,983 | 2,028  |
| PCMT1                                  | -0,355 | 1,744  |
| PDAP1                                  | 0,580  | 2,280  |
| PDCD10                                 | 0,780  | 2,245  |
| PDCD6                                  | -0,055 | 1,698  |
| PDCD7                                  | 0,408  | 0,872  |
| PDHB                                   | 0,443  | 2,173  |
| PDIA6                                  | -0,875 | 2,323  |
| PDLIM1                                 | -1,027 | 1,490  |
| PDXK                                   | -0,147 | 2,152  |
| PDZD8                                  | 1,301  | 1,015  |
| PDZK1;PDZK<br>1P1                      | 0,221  | 1,529  |
| PEF1                                   | 0,780  | 1,618  |
| PFKFB3                                 | -0,491 | 1,876  |
| PHF21A                                 | -0,172 | 0,912  |
| PHPT1                                  | -1,456 | 1,631  |
| PKD2                                   | -0,246 | 1,512  |
| PKM                                    | 0,138  | 1,293  |
| PLCG1                                  | 0,034  | 1,449  |

| Gene symbol                                     | Ctrl   | 56h    |
|-------------------------------------------------|--------|--------|
| PLEC                                            | 1,559  | 0,039  |
| PLEKHM1                                         | -0,373 | 1,861  |
| PLXDC2                                          | 0,342  | -0,227 |
| PLXNA1                                          | 0,536  | 0,606  |
| PMM2                                            | 0,019  | 1,522  |
| PNPO                                            | 0,295  | 2,429  |
| POLR1D                                          | 0,474  | 2,045  |
| POLR2F                                          | -0,163 | 2,321  |
| POLR2H                                          | 0,297  | 2,326  |
| POU2F1;POU<br>2F3;POU2F2                        | -0,375 | 2,177  |
| PPME1                                           | 0,544  | 2,051  |
| PPP1CC                                          | 0,896  | 1,752  |
| PPP3CA                                          | -0,262 | 2,397  |
| PPT1                                            | -0,535 | 2,366  |
| PRDX1                                           | -0,598 | 1,301  |
| PRDX6                                           | 0,149  | 1,530  |
| PREP                                            | 0,203  | 1,927  |
| PRKAR1A                                         | 0,539  | 1,580  |
| PRKRA                                           | -0,459 | 2,321  |
| PRMT3                                           | 0,758  | 1,935  |
| PROSER2;C1<br>0orf47                            | 0,482  | 1,469  |
| PROSER3                                         | 0,404  | 1,906  |
| PRPF3                                           | -0,386 | 1,869  |
| PRR5-<br>ARHGAP8;PR<br>R5;LOC55315<br>8;ARHGAP8 | 0,904  | 2,058  |
| PSMA5                                           | -0,163 | 2,648  |
| PSMC3                                           | -0,330 | 2,551  |
| PSMC5                                           | 1,116  | 1,496  |
| PSMD10                                          | -0,405 | 1,478  |
| PSMD11                                          | 0,455  | 2,363  |
| PSMD3                                           | 0,314  | 2,374  |
| PSME1                                           | -0,406 | 2,347  |
| PSTPIP2                                         | 0,919  | 1,186  |
| PTMS                                            | -1,837 | 1,717  |
| PTPN6                                           | -0,893 | 2,308  |
| PTRF                                            | -0,664 | 2,277  |
| PUS3                                            | 0,495  | 1,721  |
| PVRL2                                           | 0,192  | 2,230  |
| PYCRL                                           | 0,469  | 2,356  |
| RAB14                                           | 1,175  | 1,716  |
| RAB1B;RAB1<br>C                                 | -0,686 | 2,764  |

| Gene symbol  | Ctrl   | 56h    |
|--------------|--------|--------|
| RAB28        | 1,095  | 2,052  |
| RAB30        | -0,365 | 2,099  |
| RAB5B        | -0,259 | 2,586  |
| RABEP2       | -0,262 | 2,094  |
| RABEPK       | 0,130  | 1,922  |
| RALGAPB      | 1,440  | 0,638  |
| RASSF8       | 0,580  | 1,788  |
| RBBP4;RBBP7  | 0,211  | 2,080  |
| RBM5         | 0,050  | 1,740  |
| REEP3        | 0,228  | 2,230  |
| RGL3         | -0,142 | 1,915  |
| RMDN1        | 0,290  | 1,127  |
| RMND5A       | -0,542 | 2,443  |
| RNF135       | -0,075 | 2,251  |
| RNF146       | -0,375 | 2,051  |
| RPL10A       | -0,081 | 1,516  |
| RPL14        | -0,184 | 1,415  |
| RPL32        | 0,252  | 2,423  |
| RPL5         | -0,157 | 1,169  |
| RPS15        | 0,216  | 2,002  |
| RPS17L;RPS17 | -0,420 | 2,015  |
| RRAS2        | 0,196  | 2,329  |
| RRNAD1       | 0,639  | 0,788  |
| RTCB         | 1,063  | 0,821  |
| RTN1         | -1,366 | 1,458  |
| RUFY1        | 0,690  | -1,218 |
| SCAMP1       | -0,072 | 2,538  |
| SCAMP2       | 1,237  | 1,034  |
| SCAPER       | -0,529 | 1,721  |
| SCP2         | 0,016  | 0,012  |
| SCYL3        | -1,495 | 1,908  |
| SEMA3B       | -0,208 | 1,080  |
| SERPINB9     | 0,312  | 1,387  |
| SETD1A       | -1,252 | 1,032  |
| SETX         | 0,666  | 2,414  |
| SF3A1        | 1,126  | 1,612  |
| SF3A2        | -0,433 | 2,023  |
| SH2D4A       | -0,666 | 0,532  |
| SHPK         | -0,092 | 1,255  |
| SIN3A        | 0,395  | 2,073  |
| SLC12A2      | -0,054 | 0,758  |
| SLC16A3      | 0,852  | 1,635  |
| SLC34A3;SLC  | -0,483 | 2,187  |

| Gene symbol    | Ctrl   | 56h   |
|----------------|--------|-------|
| 34A1           |        |       |
| SLTM           | -0,978 | 1,891 |
| SLX4           | 1,331  | 0,754 |
| SMCR8          | 0,924  | 1,148 |
| SND1           | -0,104 | 1,758 |
| SNIP1          | -0,607 | 2,304 |
| SNRPE          | -0,163 | 2,487 |
| SNRPF          | 0,949  | 0,940 |
| SNRPG;SNRPGP15 | -0,543 | 2,365 |
| SNRPN;SNRPNPB  | 0,313  | 2,138 |
| SNTA1          | 0,583  | 1,158 |
| SNX2           | -0,121 | 2,432 |
| SORBS2         | -0,337 | 2,685 |
| SORBS3         | -0,128 | 2,191 |
| SPATS2         | 0,090  | 2,200 |
| SPICE1         | 0,567  | 0,593 |
| SRP19          | -0,682 | 2,400 |
| SRRM1          | -0,053 | 2,677 |
| SRRM2          | 0,846  | 0,631 |
| SSBP1          | -1,153 | 0,328 |
| SSH2           | -1,243 | 1,576 |
| ST13P5;ST13    | -0,876 | 1,497 |
| STAM           | 0,127  | 2,151 |
| STAMBP         | -0,285 | 2,018 |
| STK38          | 0,408  | 2,228 |
| STXBP4         | 0,403  | 1,978 |
| SUB1           | -0,516 | 2,467 |
| SUMO1          | -0,264 | 1,654 |
| SUV420H1       | 0,330  | 2,082 |
| TACSTD2        | -1,104 | 0,944 |
| TAP1           | -0,054 | 0,983 |
| TARS           | 0,495  | 2,110 |
| TATDN2         | 0,768  | 0,871 |
| TBC1D16        | -1,283 | 1,420 |
| TBC1D20        | 0,341  | 2,068 |
| TBC1D23        | 0,128  | 2,550 |
| TBC1D4         | 0,854  | 0,536 |
| TECR           | 0,841  | 0,502 |
| TET2           | 0,434  | 2,176 |
| TFE3           | -0,379 | 1,469 |
| TICAM1         | -1,322 | 1,921 |
| TIMP2          | 0,153  | 1,917 |
| TK2            | 1,295  | 1,463 |

| Gene symbol | Ctrl   | 56h   |
|-------------|--------|-------|
| TLDC1       | 0,593  | 1,714 |
| TLN1        | -0,560 | 1,892 |
| TMEM106B    | -0,727 | 1,288 |
| TMEM55B     | 0,009  | 1,605 |
| TMOD3       | -1,261 | 2,450 |
| TMUB1       | 1,385  | 0,071 |
| TOB2        | -0,526 | 1,178 |
| TOE1        | 1,122  | 1,580 |
| TOM1        | -1,190 | 2,269 |
| TOM1L1      | 0,391  | 2,476 |
| TOR1A       | -0,074 | 2,548 |
| TPD52L2     | -1,007 | 1,689 |
| TPM1        | -0,646 | 0,046 |
| TRAF3IP1    | 0,130  | 2,668 |
| TRAPPC2L    | -0,467 | 2,228 |
| TRIM2       | -0,813 | 1,330 |
| TRIM22      | -0,751 | 0,892 |
| TRIM37      | 0,680  | 1,358 |
| TRPT1       | 0,606  | 0,728 |
| TSC22D3     | -1,109 | 1,867 |
| TSC22D4     | 0,139  | 1,813 |
| TSSK4       | -0,339 | 2,216 |
| TTC9        | -0,288 | 2,447 |
| TUBA1C      | 0,404  | 2,132 |
| TUBB4B      | 0,094  | 2,606 |
| TUBB6       | -0,211 | 2,774 |
| TULP4       | 0,128  | 1,911 |
| TWF1        | 0,761  | 1,584 |
| UBA3        | 1,410  | 1,009 |
| UBE2H       | 0,800  | 1,574 |
| UBE2K       | 0,410  | 1,905 |
| UBE2M       | 0,596  | 1,836 |
| UBE2V2      | 0,070  | 2,477 |
| UBE4A       | 0,812  | 1,317 |
| UBL5        | -0,259 | 1,103 |
| UBL7        | -0,870 | 0,599 |
| UBXN2B      | -0,710 | 1,436 |
| UCHL3       | 0,535  | 2,586 |
| USP20       | 0,391  | 2,231 |
| USP48       | 0,639  | 2,132 |
| UTP11L      | 0,517  | 1,394 |
| VBP1        | 0,126  | 1,316 |
| VGLL4       | -0,827 | 1,605 |
| VPS54       | 1,299  | 1,533 |

| Gene symbol | Ctrl   | 56h    |
|-------------|--------|--------|
| VRK1        | 0,573  | 2,119  |
| VWF         | 0,514  | 0,814  |
| WARS        | -0,522 | 2,004  |
| WTAP        | -0,858 | 2,437  |
| WWC3        | -0,129 | 0,987  |
| WWOX        | 0,474  | 2,152  |
| XPC         | -0,405 | 2,469  |
| XPNPEP1     | 0,450  | 1,607  |
| XRCC6BP1    | -0,703 | 2,111  |
| YAP1        | -0,228 | 2,015  |
| YEATS2      | -0,210 | 1,208  |
| YWHAB       | -0,029 | 2,494  |
| ZBTB45      | -0,686 | 1,252  |
| ZDBF2       | 0,514  | 2,357  |
| ZFAND1      | 1,018  | 1,980  |
| ZHX2        | 0,141  | 1,867  |
| ZNF574      | 1,240  | -0,151 |
| ZNF579      | -0,170 | 1,690  |
| ZNF703      | -0,186 | 2,233  |
| ZNRF2       | -0,024 | 1,826  |

**Supplement Table 3: Cluster genes of Wnt-signaling pathway enrichment at 56 h (log2 scale).**

| <b>Gene symbol</b> | <b>Description</b>                                                               | <b>Ctrl</b> | <b>56 h</b> |
|--------------------|----------------------------------------------------------------------------------|-------------|-------------|
| EP300              | Histone acetyltransferase p300                                                   | 1,169       | -2,379      |
| PLCB3              | 1-phosphatidylinositol 4,5-bisphosphate phosphodiesterase beta-3                 | 1,805       | -1,512      |
| CSNK1A1            | Casein kinase I isoform alpha                                                    | 1,030       | -2,068      |
| CTNNBIP1           | Beta-catenin-interacting protein 1                                               | 0,344       | -2,751      |
| MAPK9              | Mitogen-activated protein kinase 9                                               | 0,701       | -2,360      |
| CHD8               | Chromodomain-helicase-DNA-binding protein 8                                      | 0,549       | -2,500      |
| DVL3               | Segment polarity protein dishevelled homolog DVL-3                               | 1,324       | -1,681      |
| PPP2R1B            | Serine/threonine-protein phosphatase 2A 65 kDa regulatory subunit A beta isoform | 1,494       | -1,453      |
| CSNK2A2            | Casein kinase II subunit alpha                                                   | 1,081       | -1,736      |
| RAC2               | Ras-related C3 botulinum toxin substrate 2                                       | 0,897       | -1,895      |
| RAC3               | Ras-related C3 botulinum toxin substrate 3                                       | 0,792       | -1,863      |
| RHOA               | Transforming protein RhoA                                                        | 0,926       | -1,682      |
| RUVBL1             | RuvB-like 1                                                                      | 1,190       | -1,343      |
| PPP3R1             | Calcineurin subunit B type 1                                                     | 0,614       | -1,877      |
| PPP2R5C            | Serine/threonine-protein phosphatase 2A 56 kDa regulatory subunit gamma isoform  | 0,759       | -1,000      |
| NFAT5              | Nuclear factor of activated T-cells 5                                            | 0,064       | -0,931      |
| CSNK1E             | Casein kinase I isoform epsilon                                                  | -1,380      | -0,968      |

**Supplement Table 4: Proteome analysis of MRTF-associated genes after 56 h (log2 scale).** #NV: not detected in proteome

| <b>Gene symbol</b> | <b>Description</b>                                                         | <b>Ctrl</b> | <b>56 h</b> |
|--------------------|----------------------------------------------------------------------------|-------------|-------------|
| MYOCD              | Myocardin                                                                  | #NV         | #NV         |
| CDH5               | Cadherin 5                                                                 | #NV         | #NV         |
| MYL9               | Myosin Light Chain 9                                                       | #NV         | #NV         |
| MIR206             | MicroRNA 206                                                               | #NV         | #NV         |
| EP300              | E1A Binding Protein P300                                                   | 1,17        | -2,38       |
| SMYD3              | SET And MYND Domain Containing 3                                           | 1,34        | -1,48       |
| RHOA               | Ras Homolog Family Member A                                                | 0,93        | -1,68       |
| MICAL2             | Microtubule Associated Monooxygenase, Calponin And LIM Domain Containing 2 | 1,82        | -0,67       |
| ATE1               | Arginyltransferase 1                                                       | 0,11        | -2,32       |
| KPNA3              | Karyopherin Subunit Alpha 3                                                | 1,83        | -0,40       |
| MKL1               | Megakaryoblastic Leukemia (Translocation) 1                                | 1,28        | -0,72       |
| BRMS1L             | BRMS1, Breast Cancer Metastasis Suppressor 1                               | 0,50        | -0,88       |
| DNMT1              | DNA Methyltransferase 1                                                    | 0,61        | -0,40       |
| MKL2               | MKL1/Myocardin Like 2                                                      | 1,18        | 0,41        |
| LIMA1              | LIM Domain And Actin Binding 1                                             | -0,71       | -1,33       |
| KPNB1              | Karyopherin Subunit Beta 1                                                 | 1,44        | 1,09        |
| C1QTNF6            | C1q And Tumor Necrosis Factor Related Protein 6                            | 0,65        | 0,41        |
| STAT3              | Signal Transducer And Activator Of Transcription 3                         | 0,83        | 0,64        |
| TRIM27             | Tripartite Motif Containing 27                                             | 0,47        | 0,73        |
| CYR61              | Cysteine Rich Angiogenic Inducer 61                                        | -0,58       | 0,00        |
| SRF                | Serum Response Factor                                                      | -0,09       | 0,54        |
| PALLD              | Palladin, Cytoskeletal Associated Protein                                  | -0,68       | 0,28        |



**Supplementary Figure 1: Full versions of the cropped Western blot in Fig. 6B**

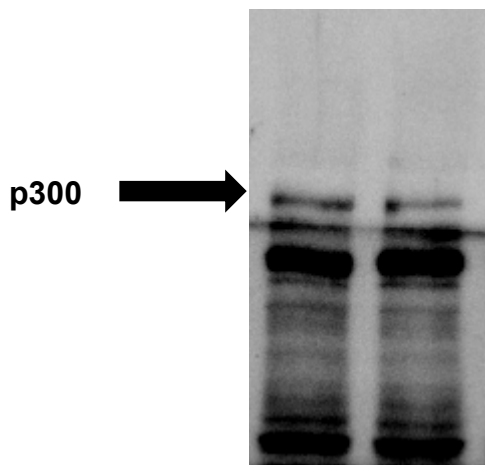

Complete blot for Figure 6B

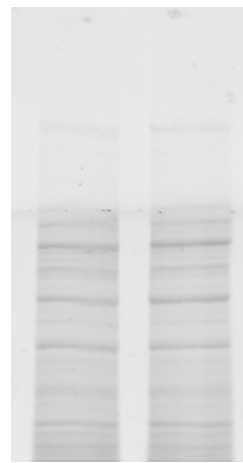

Loading control by stain-free gel  
for Figure 6B

**Supplementary Figure 2: Dot plot of enriched pathways for up-regulated proteins**

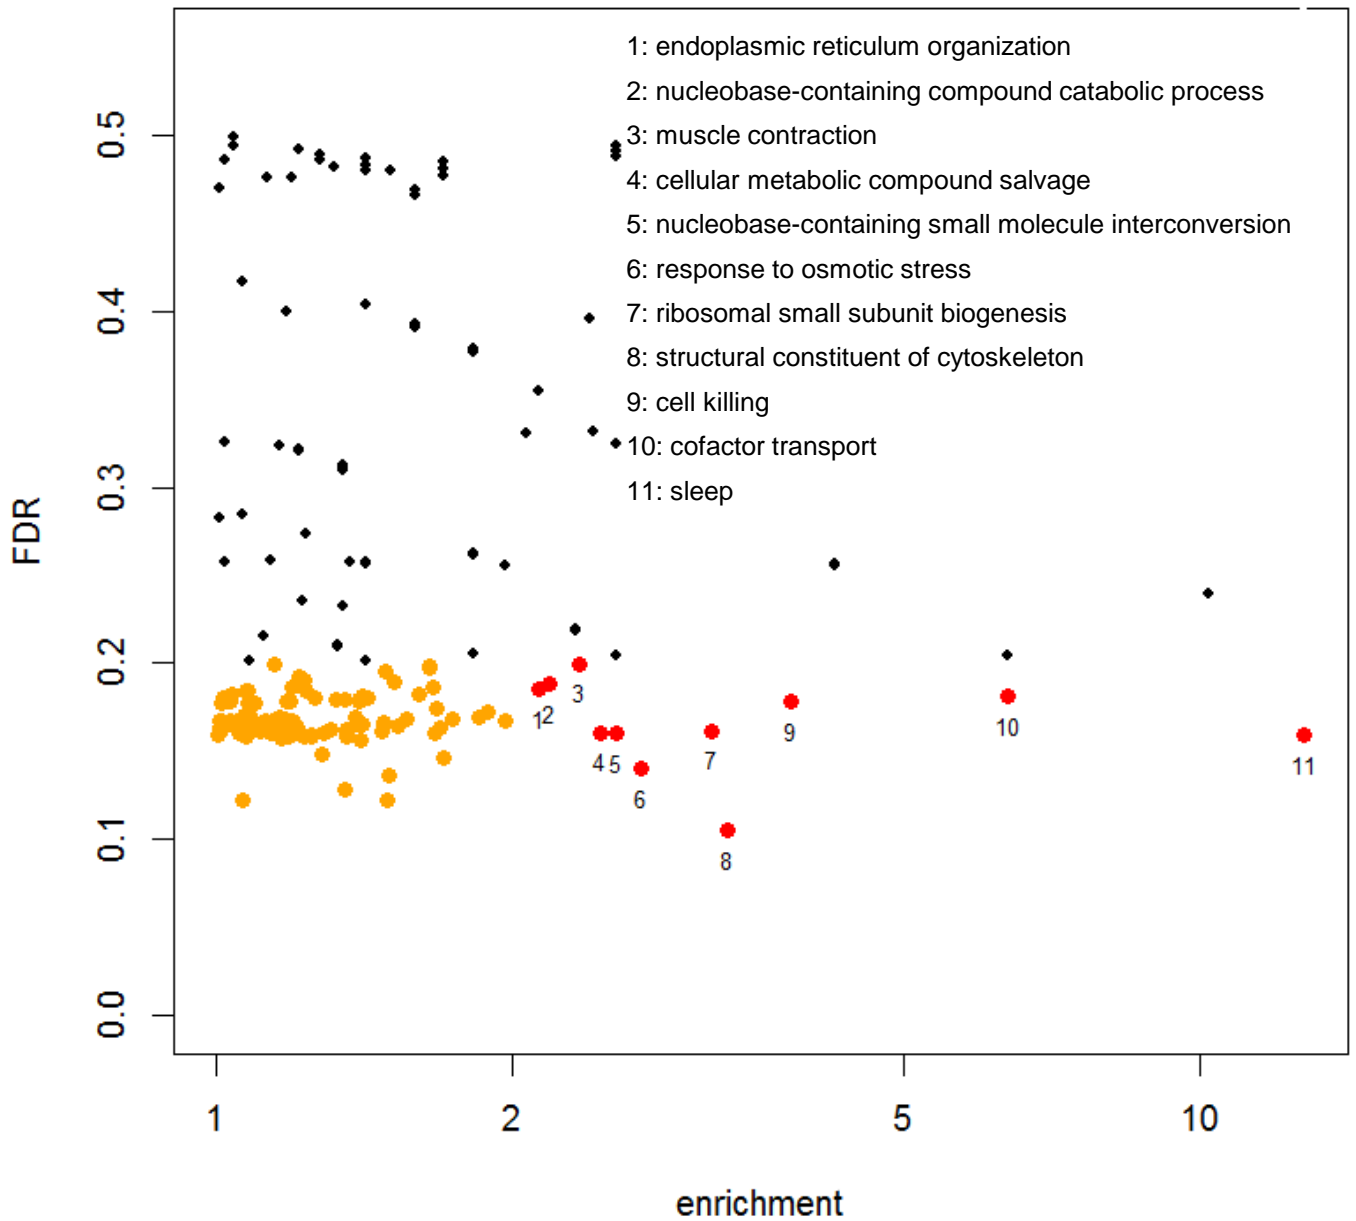

**orange dots: FDR < 0.2 and enrichment value < 2.**

**red dots: FDR < 0.2 and enrichment value > 2.**

### Supplementary Figure 3: Viability, 2D and 3D migration of primary endothelial cells (HUVECs)

#### a: Viability

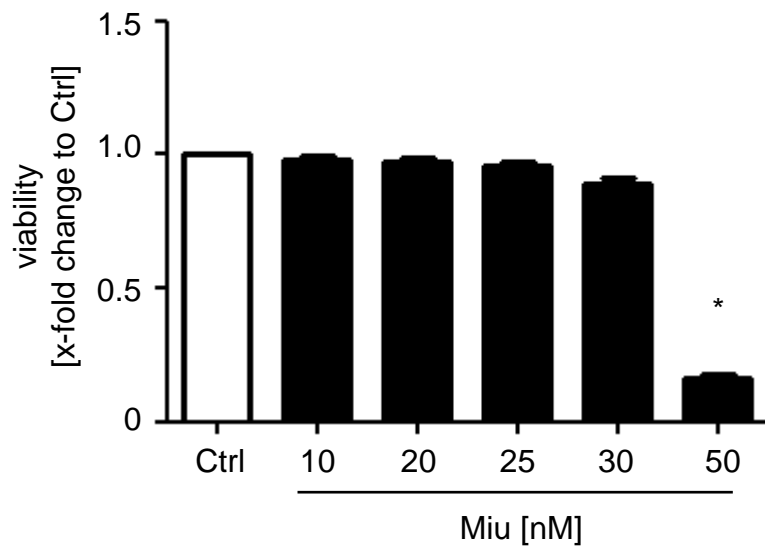

#### b: Scratch assay

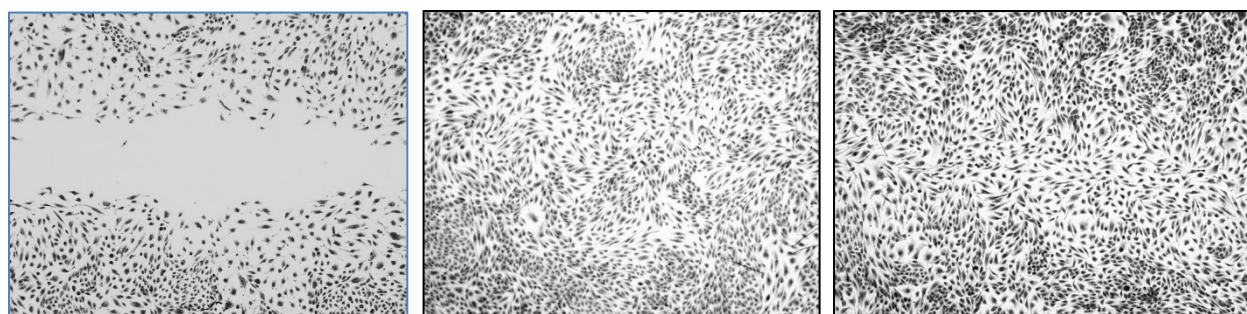

Negative control  
(minimal medium)

Positive control  
(ECGM)

Pretreatment with  
20 nM Miu for 72 h

#### c: Boyden chamber

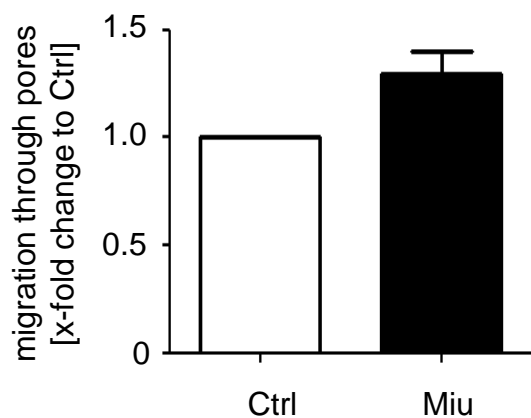

Supplement: 41598_2017_16759_MOESM1_ESM.pdf [file 41598_2017_16759_MOESM1_ESM.pdf]
